# Supplementary material for: Rare CNVs and Known Genes Linked to Macrocephaly: Review of Genomic Loci and Promising Candidate Genes
Source: MDPI journal article supplement (doi:10.3390/genes13122285), 2022-12-04

**Table S1.** Genes with a recognizable association with macrocephaly, retrieved from OMIM and the scientific literature.

| Gene            | Gene/Locus name                                                  | Cytogenetic location (hg38) |
|-----------------|------------------------------------------------------------------|-----------------------------|
| <i>ABCC9</i>    | ATP binding cassette subfamily C member 9                        | 12p12.1                     |
| <i>ACAN</i>     | Aggrecan                                                         | 15q26.1                     |
| <i>ACER3</i>    | Alkaline ceramidase 3                                            | 11q13.5                     |
| <i>ADK</i>      | Adenosine kinase                                                 | 10q22.2                     |
| <i>ADNP</i>     | Activity dependent neuroprotector homeobox                       | 20q13.13                    |
| <i>AKT1</i>     | AKT serine/threonine kinase 1                                    | 14q32.33                    |
| <i>AKT3</i>     | AKT serine/threonine kinase 3                                    | 1q43-q44                    |
| <i>ALKBH8</i>   | AlkB homolog 8, tRNA methyltransferase                           | 11q22.3                     |
| <i>AMER1</i>    | APC membrane recruitment protein 1                               | Xq11.2                      |
| <i>AMPD1</i>    | Adenosine monophosphate deaminase 1                              | 1p13.2                      |
| <i>ANKH</i>     | ANKH inorganic pyrophosphate transport regulator                 | 5p15.2                      |
| <i>ANKRD17</i>  | Ankyrin repeat domain 17                                         | 4q13.3                      |
| <i>ANTXR1</i>   | Anthrax toxin receptor 1                                         | 2p13.3                      |
| <i>APC2</i>     | APC regulator of WNT signaling pathway 2                         | 19p13.3                     |
| <i>APOC2</i>    | Apolipoprotein C-II                                              | 19q13.32                    |
| <i>ARSB</i>     | Arylsulfatase B                                                  | 5q14.1                      |
| <i>ARSK</i>     | Arylsulfatase family member K                                    | 5q15                        |
| <i>ASH1L</i>    | ASH1 like histone lysine methyltransferase                       | 1q22                        |
| <i>ASPA</i>     | aspartoacylase                                                   | 17p13.2                     |
| <i>ASXL2</i>    | ASXL transcriptional regulator 2                                 | 2p23.3                      |
| <i>AUTS2</i>    | Activator of transcription and developmental regulator AUTS2     | 7q11.22                     |
| <i>B3GLCT</i>   | Beta 3-glucosyltransferase                                       | 13q12.3                     |
| <i>B4GALT1</i>  | Beta-1,4-galactosyltransferase 1                                 | 9p21.1                      |
| <i>B4GALT7</i>  | Beta-1,4-galactosyltransferase 7                                 | 5q35.3                      |
| <i>BAP1</i>     | BRCA1 associated protein 1                                       | 3p21.1                      |
| <i>BGN</i>      | Biglycan                                                         | Xq28                        |
| <i>BICD2</i>    | BICD cargo adaptor 2                                             | 9q22.31                     |
| <i>BICRA</i>    | BRD4 interacting chromatin remodeling complex associated protein | 19q13.33                    |
| <i>BLTP1</i>    | Bridge-like lipid transfer protein family member 1               | 4q27                        |
| <i>BRAF</i>     | B-Raf proto-oncogene, serine/threonine kinase                    | 7q34                        |
| <i>BRWD3</i>    | Bromodomain and WD repeat domain containing 3                    | Xq21.1                      |
| <i>C12orf57</i> | Chromosome 12 open reading frame 57                              | 12p13.31                    |
| <i>CACNA1E</i>  | Calcium voltage-gated channel subunit alpha1 E                   | 1q25.3                      |
| <i>CAMK2G</i>   | Calcium/calmodulin dependent protein kinase II gamma             | 10q22.2                     |
| <i>CANT1</i>    | Calcium activated nucleotidase 1                                 | 17q25.3                     |
| <i>CASK</i>     | Calcium/calmodulin dependent serine protein kinase               | Xp11.4                      |
| <i>CBL</i>      | Cbl proto-oncogene                                               | 11q23.3                     |
| <i>CCND2</i>    | Cyclin D2                                                        | 12p13.32                    |
| <i>CCNK</i>     | Cyclin K                                                         | 14q32.2                     |
| <i>CDC42BPB</i> | CDC42 binding protein kinase beta                                | 14q32.32                    |
| <i>CDH2</i>     | Cadherin 2                                                       | 18q12.1                     |
| <i>CDKN1C</i>   | Cyclin-dependent kinase inhibitor 1C                             | 11p15.4                     |
| <i>CEP120</i>   | Centrosomal protein, 120kD                                       | 5q23.2                      |
| <i>CHD1</i>     | Chromodomain helicase DNA binding protein-1                      | 5q15-q21.1                  |
| <i>CHD3</i>     | Chromodomain helicase DNA binding protein-3                      | 17p13.1                     |
| <i>CHD4</i>     | Chromodomain helicase DNA-binding protein-4                      | 12p13.31                    |
| <i>CHD8</i>     | Chromodomain helicase DNA-binding protein 8                      | 14q11.2                     |
| <i>COL2A1</i>   | Collagen II, alpha-1 polypeptide                                 | 12q13.11                    |
| <i>COL3A1</i>   | Collagen III, alpha-1 polypeptide                                | 2q32.2                      |
| <i>CPE</i>      | Carboxypeptidase E                                               | 4q32.3                      |
| <i>CRPPA</i>    | CDP-L-ribitol pyrophosphorylase A                                | 7p21.2                      |
| <i>CSF1R</i>    | Colony stimulating factor 1 receptor                             | 5q32                        |

|                  |                                                             |               |
|------------------|-------------------------------------------------------------|---------------|
| <b>5GALNACT1</b> | Chondroitin sulfate N-acetylgalactosaminyltransferase 1     | 8p21.3        |
| <b>CSNK2A1</b>   | Casein kinase 2 alpha 1                                     | 20p13         |
| <b>CUL4B</b>     | Cullin 4B                                                   | Xq24          |
| <b>CUL7</b>      | Cullin 7                                                    | 6p21.1        |
| <b>CWC27</b>     | CWC27 spliceosome associated cyclophilin                    | 5q12.3        |
| <b>D2HGDH</b>    | D-2-hydroxyglutarate dehydrogenase                          | 2q37.3        |
| <b>DAG1</b>      | Dystroglycan 1                                              | 3p21.31       |
| <b>DDX3X</b>     | DEAD-box helicase 3 X-linked                                | Xp11.4        |
| <b>DEAF1</b>     | DEAF1 transcription factor                                  | 11p15.5       |
| <b>DEPDC5</b>    | DEP domain containing 5                                     | 22q12.2-q12.3 |
| <b>DHCR24</b>    | 24-dehydrocholesterol reductase                             | 1p32.3        |
| <b>DICER1</b>    | Dicer 1, ribonuclease III                                   | 14q32.13      |
| <b>DIS3L2</b>    | DIS3 like 3'-5' exoribonuclease 2                           | 2q37.1        |
| <b>DLX3</b>      | Distal-less homeobox 3                                      | 17q21.33      |
| <b>DMXL2</b>     | Dmx like 2                                                  | 15q21.2       |
| <b>DNAJC21</b>   | DnaJ heat shock protein family (Hsp40) member C21           | 5p13.2        |
| <b>DNM1</b>      | Dynamitin 1                                                 | 9q34.11       |
| <b>DNMT3A</b>    | DNA methyltransferase 3 alpha                               | 2p23.3        |
| <b>DOCK3</b>     | Dedicator of cytokinesis 3                                  | 3p21.2        |
| <b>DOCK6</b>     | Dedicator of cytokinesis 6                                  | 19p13.2       |
| <b>DPYSL5</b>    | Dihydropyrimidinase-like 5                                  | 2p23.3        |
| <b>DVL1</b>      | Dishevelled segment polarity protein 1                      | 1p36.33       |
| <b>DVL3</b>      | Dishevelled segment polarity protein 3                      | 3q27.1        |
| <b>DYNC2I1</b>   | Dynein 2 intermediate chain 1                               | 7q36.3        |
| <b>DYNC2LI1</b>  | Dynein cytoplasmic 2 light intermediate chain 1             | 2p21          |
| <b>EBP</b>       | EBP cholesterol delta-isomerase                             | Xp11.23       |
| <b>EED</b>       | Embryonic ectoderm development                              | 11q14.2       |
| <b>EHMT1</b>     | Euchromatic histone lysine methyltransferase 1              | 9q34.3        |
| <b>EIF2B1</b>    | Eukaryotic translation initiation factor 2B subunit alpha   | 12q24.31      |
| <b>EIF2B2</b>    | Eukaryotic translation initiation factor 2B subunit beta    | 14q24.3       |
| <b>EIF2B3</b>    | Eukaryotic translation initiation factor 2B subunit gamma   | 1p34.1        |
| <b>EIF2B4</b>    | Eukaryotic translation initiation factor 2B subunit delta   | 2p23.3        |
| <b>EIF2B5</b>    | Eukaryotic translation initiation factor 2B subunit epsilon | 3q27.1        |
| <b>EML1</b>      | EMAP like 1                                                 | 14q32.2       |
| <b>ERF</b>       | ETS2 repressor factor                                       | 19q13.2       |
| <b>ETFA</b>      | Electron transfer flavoprotein subunit alpha                | 15q24.2-q24.3 |
| <b>ETFB</b>      | Electron transfer flavoprotein subunit beta                 | 19q13.41      |
| <b>ETFDH</b>     | Electron transfer flavoprotein dehydrogenase                | 4q32.1        |
| <b>EXT2</b>      | Exostosin glycosyltransferase 2                             | 11p11.2       |
| <b>EZH2</b>      | Enhancer of zeste 2 polycomb repressive complex 2 subunit   | 7q36.1        |
| <b>FAM111A</b>   | FAM111 trypsin like peptidase A                             | 11q12.1       |
| <b>FAM149B1</b>  | Family with sequence similarity 149 member B1               | 10q22.2       |
| <b>FAM20C</b>    | FAM20C golgi associated secretory pathway kinase            | 7p22.3        |
| <b>FAR1</b>      | Fatty acyl-CoA reductase 1                                  | 11p15.3       |
| <b>FBN1</b>      | Fibrillin 1                                                 | 15q21.1       |
| <b>FBXW11</b>    | F-box and WD repeat domain containing 11                    | 5q35.1        |
| <b>FGFR1</b>     | Fibroblast growth factor receptor 1                         | 8p11.23       |
| <b>FGFR2</b>     | Fibroblast growth factor receptor 2                         | 10q26.13      |
| <b>FGFR3</b>     | Fibroblast growth factor receptor 3                         | 4p16.3        |
| <b>FH</b>        | Fumarate hydratase                                          | 1q43          |
| <b>FIBP</b>      | FGF1 intracellular binding protein                          | 11q13.1       |
| <b>FKTN</b>      | Fukutin                                                     | 9q31.2        |
| <b>FLNA</b>      | Filamin A                                                   | Xq28          |
| <b>FMR1</b>      | Fragile X messenger ribonucleoprotein 1                     | Xq27.3        |
| <b>FOXP1</b>     | Forkhead box P1                                             | 3p13          |
| <b>GABBR2</b>    | Gamma-aminobutyric acid type B receptor subunit 2           | 9q22.33       |
| <b>GATAD2B</b>   | GATA zinc finger domain containing 2B                       | 1q21.3        |
| <b>GCDH</b>      | Glutaryl-coa dehydrogenase                                  | 19p13.13      |

|                  |                                                                             |          |
|------------------|-----------------------------------------------------------------------------|----------|
| <b>GDF6</b>      | Growth differentiation factor 6                                             | 8q22.1   |
| <b>GFAP</b>      | Glial fibrillary acidic protein                                             | 17q21.31 |
| <b>GJA1</b>      | Gap junction protein alpha 1                                                | 6q22.31  |
| <b>GLI2</b>      | GLI family zinc finger 2                                                    | 2q14.2   |
| <b>GLI3</b>      | GLI family zinc finger 3                                                    | 7p14.1   |
| <b>GNAI1</b>     | G protein subunit alpha i1                                                  | 7q21.11  |
| <b>GNAI3</b>     | G protein subunit alpha i3                                                  | 1p13.3   |
| <b>GNAQ</b>      | G protein subunit alpha q                                                   | 9q21.2   |
| <b>GNE</b>       | Glucosamine (UDP-N-acetyl)-2-epimerase/N-acetylmannosamine kinase           | 9p13.3   |
| <b>GPC3</b>      | Glypican 3                                                                  | Xq26.2   |
| <b>GPC4</b>      | Glypican 4                                                                  | Xq26.2   |
| <b>GPSM2</b>     | G protein signaling modulator 2                                             | 1p13.3   |
| <b>GRIA3</b>     | Glutamate ionotropic receptor AMPA type subunit 3                           | Xq25     |
| <b>GRIN2B</b>    | Glutamate ionotropic receptor NMDA type subunit 2B                          | 12p13.1  |
| <b>GUSB</b>      | Glucuronidase beta                                                          | 7q11.21  |
| <b>H1-4</b>      | H1.4 linker histone, cluster member                                         | 6p22.2   |
| <b>H3-3A</b>     | H3.3 histone A                                                              | 1q42.12  |
| <b>H3-3B</b>     | H3.3 histone B                                                              | 17q25.1  |
| <b>HADHA</b>     | 3-oxoacyl-coa dehydrogenase trifunctional multienzyme complex subunit alpha | 2p23.3   |
| <b>HDAC6</b>     | Histone deacetylase 6                                                       | Xp11.23  |
| <b>HECW2</b>     | HECT, C2 and WW domain containing E3 ubiquitin protein ligase 2             | 2q32.3   |
| <b>HEPACAM</b>   | Hepatic and glial cell adhesion molecule                                    | 11q24.2  |
| <b>HERC1</b>     | CT and RLD domain containing E3 ubiquitin protein ligase family member 1    | 15q22.31 |
| <b>HEXB</b>      | Hexosaminidase subunit beta                                                 | 5q13.3   |
| <b>HMG A2</b>    | High mobility group AT-hook 2                                               | 12q14.3  |
| <b>HRAS</b>      | HRas proto-oncogene, GTPase                                                 | 11p15.5  |
| <b>HSD17B4</b>   | Hydroxysteroid 17-beta dehydrogenase 4                                      | 5q23.1   |
| <b>HUWE1</b>     | HECT, UBA and WWE domain containing E3 ubiquitin protein ligase 1           | Xp11.22  |
| <b>HYLS1</b>     | HYLS1 centriolar and ciliogenesis associated                                | 11q24.2  |
| <b>IDS</b>       | Iduronate 2-sulfatase                                                       | Xq28     |
| <b>IDUA</b>      | Alpha-L-iduronidase                                                         | 4p16.3   |
| <b>IFITM5</b>    | Interferon induced transmembrane protein 5                                  | 11p15.5  |
| <b>IFT43</b>     | Intraflagellar transport 43                                                 | 14q24.3  |
| <b>IFT74</b>     | Intraflagellar transport 74                                                 | 9p21.2   |
| <b>IFT81</b>     | Intraflagellar transport 81                                                 | 12q24.11 |
| <b>IGBP1</b>     | Immunoglobulin binding protein 1                                            | Xq13.1   |
| <b>IGF2</b>      | Insulin like growth factor 2                                                | 11p15.5  |
| <b>IL6ST</b>     | Interleukin 6 cytokine family signal transducer                             | 5q11.2   |
| <b>INPP5E</b>    | Inositol polyphosphate-5-phosphatase E                                      | 9q34.3   |
| <b>INPPL1</b>    | Inositol polyphosphate phosphatase like 1                                   | 11q13.4  |
| <b>ITCH</b>      | Itchy E3 ubiquitin protein ligase                                           | 20q11.22 |
| <b>KCNH1</b>     | Potassium voltage-gated channel subfamily H member 1                        | 1q32.2   |
| <b>KCNJ8</b>     | Potassium inwardly rectifying channel subfamily J member 8                  | 12p12.1  |
| <b>KCTD13</b>    | Potassium channel tetramerization domain containing 13                      | 16p11.2  |
| <b>KDM1A</b>     | Lysine demethylase 1A                                                       | 1p36.12  |
| <b>KDM5B</b>     | Lysine demethylase 5B                                                       | 1q32.1   |
| <b>KDM5C</b>     | Lysine demethylase 5C                                                       | Xp11.22  |
| <b>KIAA0753</b>  | KIAA0753                                                                    | 17p13.1  |
| <b>KIDINS220</b> | Kinase D interacting substrate 220                                          | 2p25.1   |
| <b>KIF22</b>     | Kinesin family member 22                                                    | 16p11.2  |
| <b>KIF7</b>      | Kinesin family member 7                                                     | 15q26.1  |
| <b>KMT2E</b>     | Lysine methyltransferase 2E (inactive)                                      | 7q22.3   |
| <b>KMT5B</b>     | Lysine methyltransferase 5B                                                 | 11q13.2  |
| <b>KPTN</b>      | Kaptein, actin binding protein                                              | 19q13.32 |
| <b>KRAS</b>      | KRAS proto-oncogene, GTPase                                                 | 12p12.1  |
| <b>L1CAM</b>     | L1 cell adhesion molecule                                                   | Xq28     |
| <b>L2HGDH</b>    | L-2-hydroxyglutarate dehydrogenase                                          | 14q21.3  |
| <b>LAMB1</b>     | Laminin subunit beta 1                                                      | 7q31.1   |

|                |                                                                        |               |
|----------------|------------------------------------------------------------------------|---------------|
| <b>LBR</b>     | Lamin B receptor                                                       | 1q42.12       |
| <b>LRP2</b>    | LDL receptor related protein 2                                         | 2q31.1        |
| <b>MAB21L2</b> | mab-21 like 2                                                          | 4q31.3        |
| <b>MADD</b>    | MAP kinase activating death domain                                     | 11p11.2       |
| <b>MAN1B1</b>  | Mannosidase alpha class 1B member 1                                    | 9q34.3        |
| <b>MAN2B1</b>  | Mannosidase alpha class 2B member 1                                    | 19p13.13      |
| <b>MAN2C1</b>  | Mannosidase alpha class 2C member 1                                    | 15q24.2       |
| <b>MAP2K1</b>  | Mitogen-activated protein kinase kinase 1                              | 15q22.31      |
| <b>MAP2K2</b>  | Mitogen-activated protein kinase kinase 2                              | 19p13.3       |
| <b>MCCC2</b>   | Methylcrotonyl-coa carboxylase subunit 2                               | 5q13.2        |
| <b>MCEE</b>    | Methylmalonyl-coa epimerase                                            | 2p13.3        |
| <b>MECP2</b>   | Methyl-cpg binding protein 2                                           | Xq28          |
| <b>MED12</b>   | Mediator complex subunit 12                                            | Xq13.1        |
| <b>MESD</b>    | Mesoderm development LRP chaperone                                     | 15q25.1       |
| <b>MGAT2</b>   | alpha-1,6-mannosyl-glycoprotein 2-beta-N-acetylglucosaminyltransferase | 14q21.3       |
| <b>MITF</b>    | Melanocyte inducing transcription factor                               | 3p13          |
| <b>MLC1</b>    | Modulator of VRAC current 1                                            | 22q13.33      |
| <b>MOCS1</b>   | Molybdenum cofactor synthesis 1                                        | 6p21.2        |
| <b>MOCS2</b>   | Molybdenum cofactor synthesis 2                                        | 5q11.2        |
| <b>MPDZ</b>    | Multiple PDZ domain crumbs cell polarity complex component             | 9p23          |
| <b>MRAS</b>    | Muscle RAS oncogene homolog                                            | 3q22.3        |
| <b>MSL3</b>    | MSL complex subunit 3                                                  | Xp22.2        |
| <b>MTOR</b>    | Mechanistic target of rapamycin kinase                                 | 1p36.22       |
| <b>MTM1</b>    | Myotubularin 1                                                         | Xq28          |
| <b>MUSK</b>    | Muscle associated receptor tyrosine kinase                             | 9q31.3        |
| <b>MYCN</b>    | MYCN proto-oncogene, bHLH transcription factor                         | 2p24.3        |
| <b>MYH8</b>    | Myosin heavy chain 8                                                   | 17p13.1       |
| <b>MYMK</b>    | Myomaker, myoblast fusion factor                                       | 9q34.2        |
| <b>NBPF1</b>   | NBPF member 1                                                          | 1p36.13       |
| <b>NDN</b>     | Necdin, MAGE family member                                             | 15q11.2       |
| <b>NDUFAF3</b> | NADH:ubiquinone oxidoreductase complex assembly factor 3               | 3p21.31       |
| <b>NDUFAF5</b> | NADH:ubiquinone oxidoreductase complex assembly factor 5               | 20p12.1       |
| <b>NDUFS4</b>  | NADH:ubiquinone oxidoreductase subunit S4                              | 5q11.2        |
| <b>NDUFV1</b>  | NADH:ubiquinone oxidoreductase core subunit V1                         | 11q13.2       |
| <b>NEK1</b>    | NIMA related kinase 1                                                  | 4q33          |
| <b>NF1</b>     | Neurofibromin 1                                                        | 17q11.2       |
| <b>NFIA</b>    | Nuclear factor I A                                                     | 1p31.3        |
| <b>NFIB</b>    | Nuclear factor I B                                                     | 9p23-p22.3    |
| <b>NFIX</b>    | Nuclear factor I X                                                     | 19p13.13      |
| <b>NKX3-2</b>  | NK3 homeobox 2                                                         | 4p15.33       |
| <b>NONO</b>    | Non-POU domain containing octamer binding                              | Xq13.1        |
| <b>NR2F1</b>   | Nuclear receptor subfamily 2 group F member 1                          | 5q15          |
| <b>NRAS</b>    | NRAS proto-oncogene, GTPase                                            | 1p13.2        |
| <b>NSD1</b>    | Nuclear receptor binding SET domain protein 1                          | 5q35.3        |
| <b>NXN</b>     | Nucleoredoxin                                                          | 17p13.3       |
| <b>OBSL1</b>   | Obscurin like cytoskeletal adaptor 1                                   | 2q35          |
| <b>ODC1</b>    | Ornithine decarboxylase 1                                              | 2p25.1        |
| <b>OFD1</b>    | OFD1 centriole and centriolar satellite protein                        | Xp22.2        |
| <b>OPHN1</b>   | Oligophrenin 1                                                         | Xq12          |
| <b>OTUD5</b>   | OTU deubiquitinase 5                                                   | Xp11.23       |
| <b>P4HB</b>    | Prolyl 4-hydroxylase subunit beta                                      | 17q25.3       |
| <b>PAK1</b>    | P21 (RAC1) activated kinase 1                                          | 11q13.5-q14.1 |
| <b>PAK3</b>    | P21 (RAC1) activated kinase 3                                          | Xq23          |
| <b>PAM16</b>   | Presequence translocase associated motor 16                            | 16p13.3       |
| <b>PC</b>      | Pyruvate carboxylase                                                   | 11q13.2       |
| <b>PCGF2</b>   | Polycomb group ring finger 2                                           | 17q12         |
| <b>PDSS1</b>   | Decaprenyl diphosphate synthase subunit 1                              | 10p12.1       |
| <b>PEX1</b>    | Peroxisomal biogenesis factor 1                                        | 7q21.2        |

|                 |                                                                        |                       |
|-----------------|------------------------------------------------------------------------|-----------------------|
| <b>PHF21A</b>   | PHD finger protein 21A                                                 | <b>11p11.2</b>        |
| <b>PHF6</b>     | PHD finger protein 6                                                   | <b>Xq26.2</b>         |
| <b>PIGA</b>     | Phosphatidylinositol glycan anchor biosynthesis class A                | <b>Xp22.2</b>         |
| <b>PIGM</b>     | Phosphatidylinositol glycan anchor biosynthesis class M                | <b>1q23.2</b>         |
| <b>PIGN</b>     | Phosphatidylinositol glycan anchor biosynthesis class N                | <b>18q21.33</b>       |
| <b>PIGT</b>     | Phosphatidylinositol glycan anchor biosynthesis class T                | <b>20q13.12</b>       |
| <b>PIGV</b>     | Phosphatidylinositol glycan anchor biosynthesis class V                | <b>1p36.11</b>        |
| <b>PIK3CA</b>   | Phosphatidylinositol-4,5-bisphosphate 3-kinase catalytic subunit alpha | <b>3q26.32</b>        |
| <b>PIK3R1</b>   | Phosphoinositide-3-kinase regulatory subunit 1                         | <b>5q13.1</b>         |
| <b>PIK3R2</b>   | Phosphoinositide-3-kinase regulatory subunit 2                         | <b>19p13.11</b>       |
| <b>PKDCC</b>    | Protein kinase domain containing, cytoplasmic                          | <b>2p21</b>           |
| <b>PLAG1</b>    | PLAG1 zinc finger                                                      | <b>8q12.1</b>         |
| <b>PLCB4</b>    | Phospholipase C beta 4                                                 | <b>20p12.3-p12.2</b>  |
| <b>PLCH1</b>    | Phospholipase C eta 1                                                  | <b>3q25.31</b>        |
| <b>PLG</b>      | Plasminogen                                                            | <b>6q26</b>           |
| <b>POC1A</b>    | POC1 centriolar protein A                                              | <b>3p21.2</b>         |
| <b>POLE</b>     | DNA polymerase epsilon, catalytic subunit                              | <b>12q24.33</b>       |
| <b>POLR3A</b>   | RNA polymerase III subunit A                                           | <b>10q22.3</b>        |
| <b>POMK</b>     | Protein O-mannose kinase                                               | <b>8p11.21</b>        |
| <b>POMT1</b>    | Protein O-mannosyltransferase 1                                        | <b>9q34.13</b>        |
| <b>POP1</b>     | POP1 homolog, ribonuclease P/MRP subunit                               | <b>8q22.2</b>         |
| <b>PPP1CB</b>   | Protein phosphatase 1 catalytic subunit beta                           | <b>2p23.2</b>         |
| <b>PPP1R12A</b> | Protein phosphatase 1 regulatory subunit 12A                           | <b>12q21.2-q21.31</b> |
| <b>PPP2CA</b>   | Protein phosphatase 2 catalytic subunit alpha                          | <b>5q31.1</b>         |
| <b>PPP2R5D</b>  | Protein phosphatase 2 regulatory subunit b'delta                       | <b>6p21.1</b>         |
| <b>PTCH1</b>    | Patched 1                                                              | <b>9q22.32</b>        |
| <b>PTCH2</b>    | Patched 2                                                              | <b>1p34.1</b>         |
| <b>PTEN</b>     | Phosphatase and tensin homolog                                         | <b>10q23.31</b>       |
| <b>PTPN11</b>   | Protein tyrosine phosphatase non-receptor type 11                      | <b>12q24.13</b>       |
| <b>PUF60</b>    | Poly(U) binding splicing factor 60                                     | <b>8q24.3</b>         |
| <b>RAB39A</b>   | RAB39A, member RAS oncogene family                                     | <b>11q22.3</b>        |
| <b>RAB39B</b>   | RAB39B, member RAS oncogene family                                     | <b>Xq28</b>           |
| <b>RAC1</b>     | Rac family small GTPase 1                                              | <b>7p22.1</b>         |
| <b>RAF1</b>     | Raf-1 proto-oncogene, serine/threonine kinase                          | <b>3p25.2</b>         |
| <b>RALA</b>     | RAS like proto-oncogene A                                              | <b>7p14.1</b>         |
| <b>RHEB</b>     | Ras homolog, mTORC1 binding                                            | <b>7q36.1</b>         |
| <b>RIN2</b>     | Ras and Rab interactor 2                                               | <b>20p11.23</b>       |
| <b>RIT1</b>     | Ras like without CAAX 1                                                | <b>1q22</b>           |
| <b>RNF125</b>   | Ring finger protein 125                                                | <b>18q12.1</b>        |
| <b>RNF135</b>   | Ring finger protein 135                                                | <b>17q11.2</b>        |
| <b>ROR2</b>     | Receptor tyrosine kinase like orphan receptor 2                        | <b>9q22.31</b>        |
| <b>RPS6KA3</b>  | Ribosomal protein S6 kinase A3                                         | <b>Xp22.12</b>        |
| <b>RRAS2</b>    | RAS related 2                                                          | <b>11p15.2</b>        |
| <b>RXYLT1</b>   | Ribitol xylosyltransferase 1                                           | <b>12q14.2</b>        |
| <b>SATB2</b>    | SATB homeobox 2                                                        | <b>2q33.1</b>         |
| <b>SEC23A</b>   | SEC23 homolog A, COPII coat complex component                          | <b>14q21.1</b>        |
| <b>SEC23B</b>   | SEC23 homolog B, COPII coat complex component                          | <b>20p11.23</b>       |
| <b>SEC24D</b>   | SEC24 homolog D, COPII coat complex component                          | <b>4q26</b>           |
| <b>SERPINH1</b> | serpin family H member 1                                               | <b>11q13.5</b>        |
| <b>SETD2</b>    | SET domain containing 2, histone lysine methyltransferase              | <b>3p21.31</b>        |
| <b>SGSH</b>     | N-sulfoglucosamine sulfohydrolase                                      | <b>17q25.3</b>        |
| <b>SHANK3</b>   | SH3 and multiple ankyrin repeat domains 3                              | <b>22q13.33</b>       |
| <b>SHOC2</b>    | SHOC2 leucine rich repeat scaffold protein                             | <b>10q25.2</b>        |
| <b>SIX3</b>     | SIX homeobox 3                                                         | <b>2p21</b>           |
| <b>SLC25A1</b>  | Solute carrier family 25 member 1                                      | <b>22q11.21</b>       |
| <b>SLC2A1</b>   | Solute carrier family 2 member 1                                       | <b>1p34.2</b>         |
| <b>SLC2A10</b>  | Solute carrier family 2 member 10                                      | <b>20q13.12</b>       |
| <b>SLC44A1</b>  | Solute carrier family 44 member 1                                      | <b>9q31.1-q31.2</b>   |

|                  |                                                                             |               |
|------------------|-----------------------------------------------------------------------------|---------------|
| <b>SMAD4</b>     | SMAD family member 4                                                        | 18q21.2       |
| <b>SMO</b>       | Smoothened, frizzled class receptor                                         | 7q32.1        |
| <b>SNRPN</b>     | Small nuclear ribonucleoprotein polypeptide N                               | 15q11.2       |
| <b>SNX10</b>     | Sorting nexin 10                                                            | 7p15.2        |
| <b>SNX14</b>     | Sorting nexin 14                                                            | 6q14.3        |
| <b>SON</b>       | SON DNA and RNA binding protein                                             | 21q22.11      |
| <b>SOS1</b>      | SOS Ras/Rac guanine nucleotide exchange factor 1                            | 2p22.1        |
| <b>SOST</b>      | Sclerostin                                                                  | 17q21.31      |
| <b>SOX9</b>      | SRY-box transcription factor 9                                              | 17q24.3       |
| <b>SPINT2</b>    | Serine peptidase inhibitor, Kunitz type 2                                   | 19q13.2       |
| <b>SPOP</b>      | Speckle type BTB/POZ protein                                                | 17q21.33      |
| <b>SPRED1</b>    | Sprouty related EVH1 domain containing 1                                    | 15q14         |
| <b>SPRED2</b>    | Sprouty related EVH1 domain containing 2                                    | 2p14          |
| <b>STRADA</b>    | STE20 related adaptor alpha                                                 | 17q23.3       |
| <b>STT3A</b>     | STT3 oligosaccharyltransferase complex catalytic subunit A                  | 11q24.2       |
| <b>SUFU</b>      | SUFU negative regulator of hedgehog signaling                               | 10q24.32      |
| <b>SUZ12</b>     | SUZ12 polycomb repressive complex 2 subunit                                 | 17q11.2       |
| <b>SYN1</b>      | Synapsin I                                                                  | Xp11.3-p11.23 |
| <b>SZT2</b>      | SZT2 subunit of KICSTOR complex                                             | 1p34.2        |
| <b>TAOK1</b>     | TAO kinase 1                                                                | 17q11.2       |
| <b>TBC1D2B</b>   | TBC1 domain family member 2B                                                | 15q24.3-q25.1 |
| <b>TBC1D7</b>    | TBC1 domain family member 7                                                 | 6p24.1        |
| <b>TBCK</b>      | TBC1 domain containing kinase                                               | 4q24          |
| <b>TBL1X</b>     | Transducin beta like 1 X-linked                                             | Xp22.31-p22.2 |
| <b>TCF20</b>     | Transcription factor 20                                                     | 22q13.2       |
| <b>TCIRG1</b>    | T cell immune regulator 1, ATPase H <sup>+</sup> transporting V0 subunit a3 | 11q13.2       |
| <b>TET3</b>      | Tet methylcytosine dioxygenase 3                                            | 2p13.1        |
| <b>THRA</b>      | Thyroid hormone receptor alpha                                              | 17q21.1       |
| <b>TMCO1</b>     | Transmembrane and coiled-coil domains 1                                     | 1q24.1        |
| <b>TMEM53</b>    | Transmembrane protein 53                                                    | 1p34.1        |
| <b>TMEM165</b>   | Transmembrane protein 165                                                   | 4q12          |
| <b>TMEM216</b>   | Transmembrane protein 216                                                   | 11q12.2       |
| <b>TNFRSF11B</b> | TNF receptor superfamily member 11b                                         | 8q24.12       |
| <b>TONSL</b>     | Tonsoku like, DNA repair protein                                            | 8q24.3        |
| <b>TPI1</b>      | Triosephosphate isomerase 1                                                 | 12p13.31      |
| <b>TRIM37</b>    | Tripartite motif containing 37                                              | 17q22         |
| <b>TRIO</b>      | Trio Rho guanine nucleotide exchange factor                                 | 5p15.2        |
| <b>TRIP11</b>    | Thyroid hormone receptor interactor 11                                      | 14q32.12      |
| <b>TRIP12</b>    | Thyroid hormone receptor interactor 12                                      | 2q36.3        |
| <b>TSC1</b>      | TSC complex subunit 1                                                       | 9q34.13       |
| <b>TSC2</b>      | TSC complex subunit 2                                                       | 16p13.3       |
| <b>UPF3B</b>     | UPF3B regulator of nonsense mediated mRNA decay                             | Xq24          |
| <b>USP9X</b>     | ubiquitin specific peptidase 9 X-linked                                     | Xp11.4        |
| <b>VPS35L</b>    | VPS35 endosomal protein sorting factor like                                 | 16p12.3       |
| <b>VPS4A</b>     | Vacuolar protein sorting 4 homolog A                                        | 16q22.1       |
| <b>WASHC5</b>    | WASH complex subunit 5                                                      | 8q24.13       |
| <b>WDR81</b>     | WD repeat domain 81                                                         | 17p13.3       |
| <b>WNT5A</b>     | Wnt family member 5A                                                        | 3p14.3        |
| <b>XYLT1</b>     | Xylosyltransferase 1                                                        | 16p12.3       |
| <b>YME1L1</b>    | YME1 like 1 ATPase                                                          | 10p12.1       |
| <b>ZBTB20</b>    | Zinc finger and BTB domain containing 20                                    | 3q13.31       |
| <b>ZBTB42</b>    | Zinc finger and BTB domain containing 42                                    | 14q32.33      |
| <b>ZBTB7A</b>    | Zinc finger and BTB domain containing 7A                                    | 19p13.3       |
| <b>ZDHHC9</b>    | Zinc finger DHHC-type palmitoyltransferase 9                                | Xq26.1        |
| <b>ZIC2</b>      | Zic family member 2                                                         | 13q32.3       |
| <b>ZNF469</b>    | Zinc finger protein 469                                                     | 16q24.2       |
| <b>ZSWIM6</b>    | Zinc finger SWIM-type containing 6                                          | 5q12.1        |

**Figure S1.** Enriched biological processes of the gene set related to macrocephaly

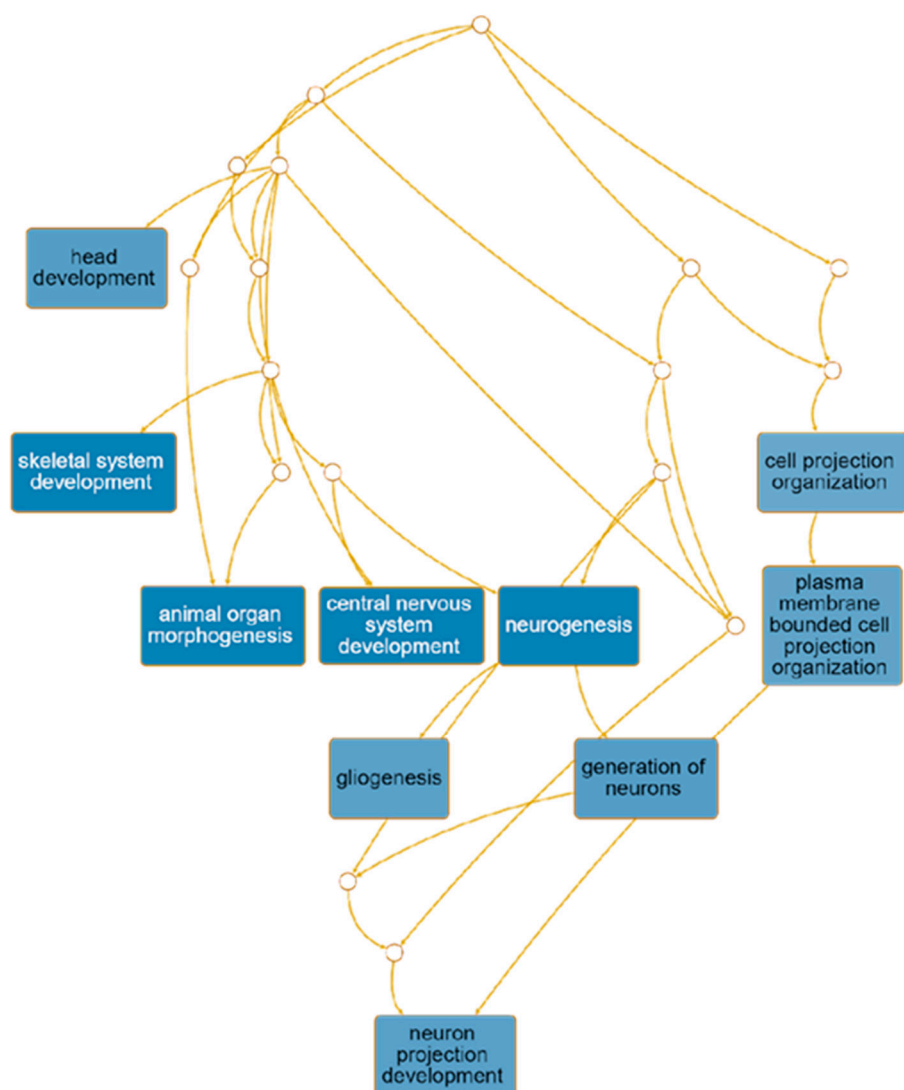

Supplement: s1 [file s1]
